# Supplementary material for: Maricaulis alexandrii sp. nov., a novel dimorphic prosthecate and active bioflocculants-bearing bacterium isolated from phycosphere microbiota of laboratory cultured highly-toxic Alexandrium catenella LZT09
Source: Research Square preprint supplement (doi:10.21203/rs.3.rs-265494/v1), 2021-03-29
Supplement: Supplementary file 1 [file 9c6c77dddfee548b15b1fffd.doc]

Supplementary materials

*Maricaulis* *alexandrii* sp. nov., a novel dimorphic prosthecate and active bioflocculants-bearing bacterium isolated from phycosphere microbiota of laboratory cultured highly-toxic *Alexandrium catenella* LZT09

Xiao-ling Zhang · Min Qi · Zhen-dong Cui · Qiao Yang

X. Zhang · M. Qi · Q. Yang ()

Department of Marine Chemistry, Zhejiang Ocean University, Zhoushan, China

e-mail: qiaoyang1979@whu.edu.cn

Z. Cui

School of Computer and Control Engineering, Yantai University, Yantai, China

Q. Yang

ABI Group, GPM Project, Zhejiang Ocean University, Zhoushan, China

**Fig. S1** Relative abundance of bacterial diversity at genus level of phycosphere microbiota of highly-toxic laboratory routinely cultured *Alexandrium catenella* LZT09 analyzed by 16S pyrosequencing


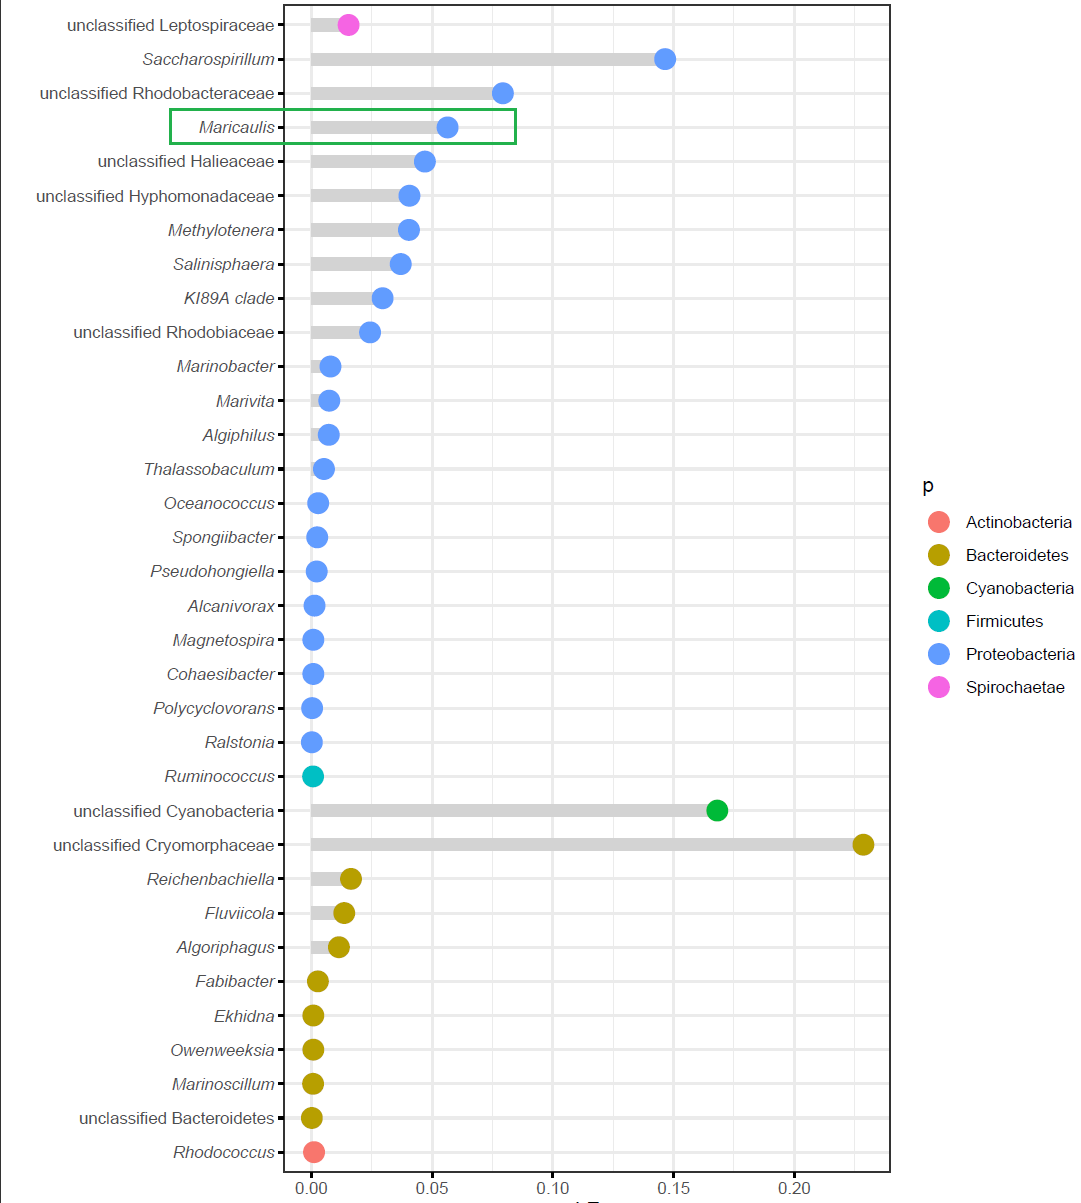


**Fig. S2** Concentration-dependent manner of bioflocculation rates of EPS produced by strain LZ-16-1T measured by bioflocculation activity assay


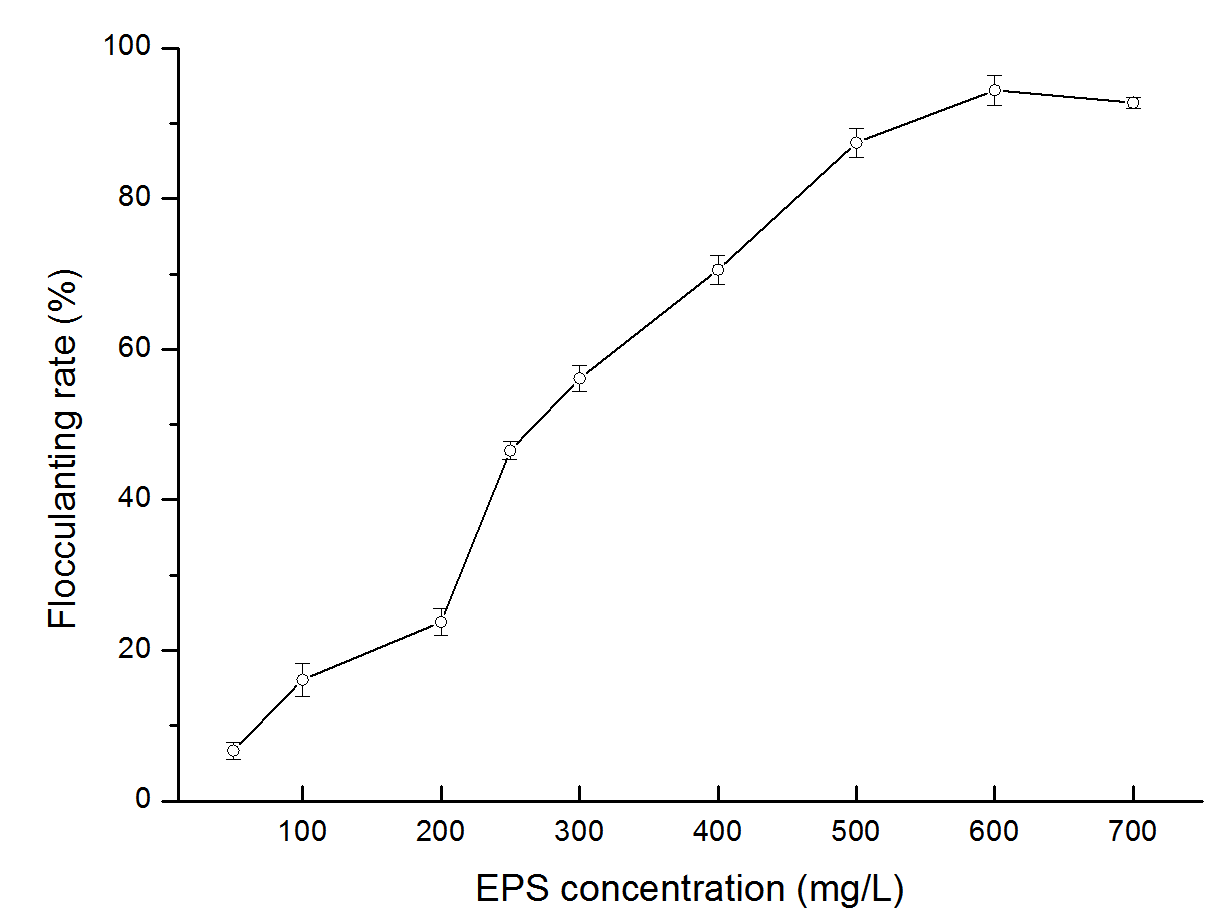


**Fig. S3** The total polar lipids of strain LZ-16-1T after two-dimensional TLC.

GL, glycolipid; L, unidentified polar lipid; PL, unidentified phospholipid; SQDG, sulfoquinovosyl diacylglycerol.

F-first dimension of TLC; S-second dimension of TLC


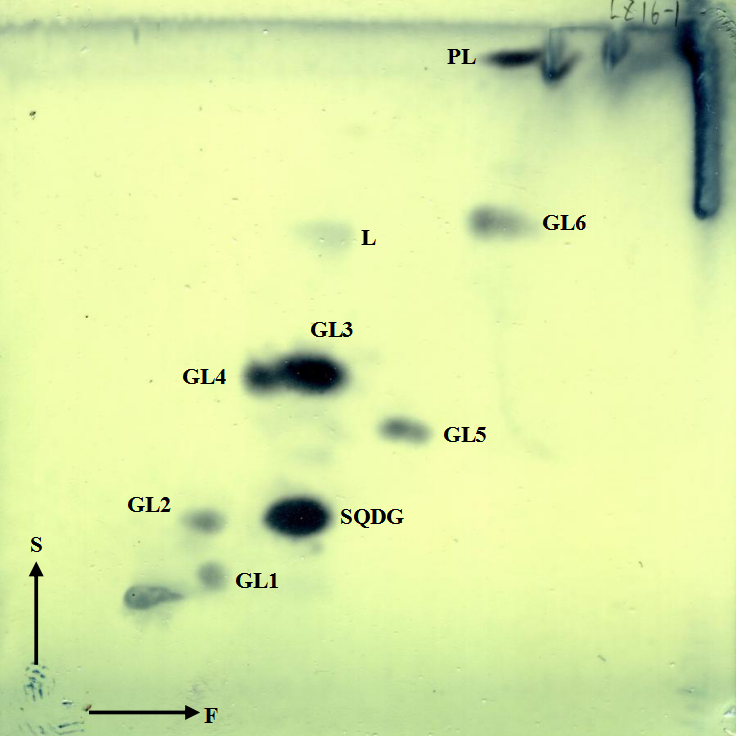


**Fig. 4** Venn diagrams for gene annotation in different databases (a), and comparative analysis of the KEGG (b), and the CAZy functional classification (c) based on the genomes of stains LZ-16-1T and *Maricaulis parjimensis* MCS 25T


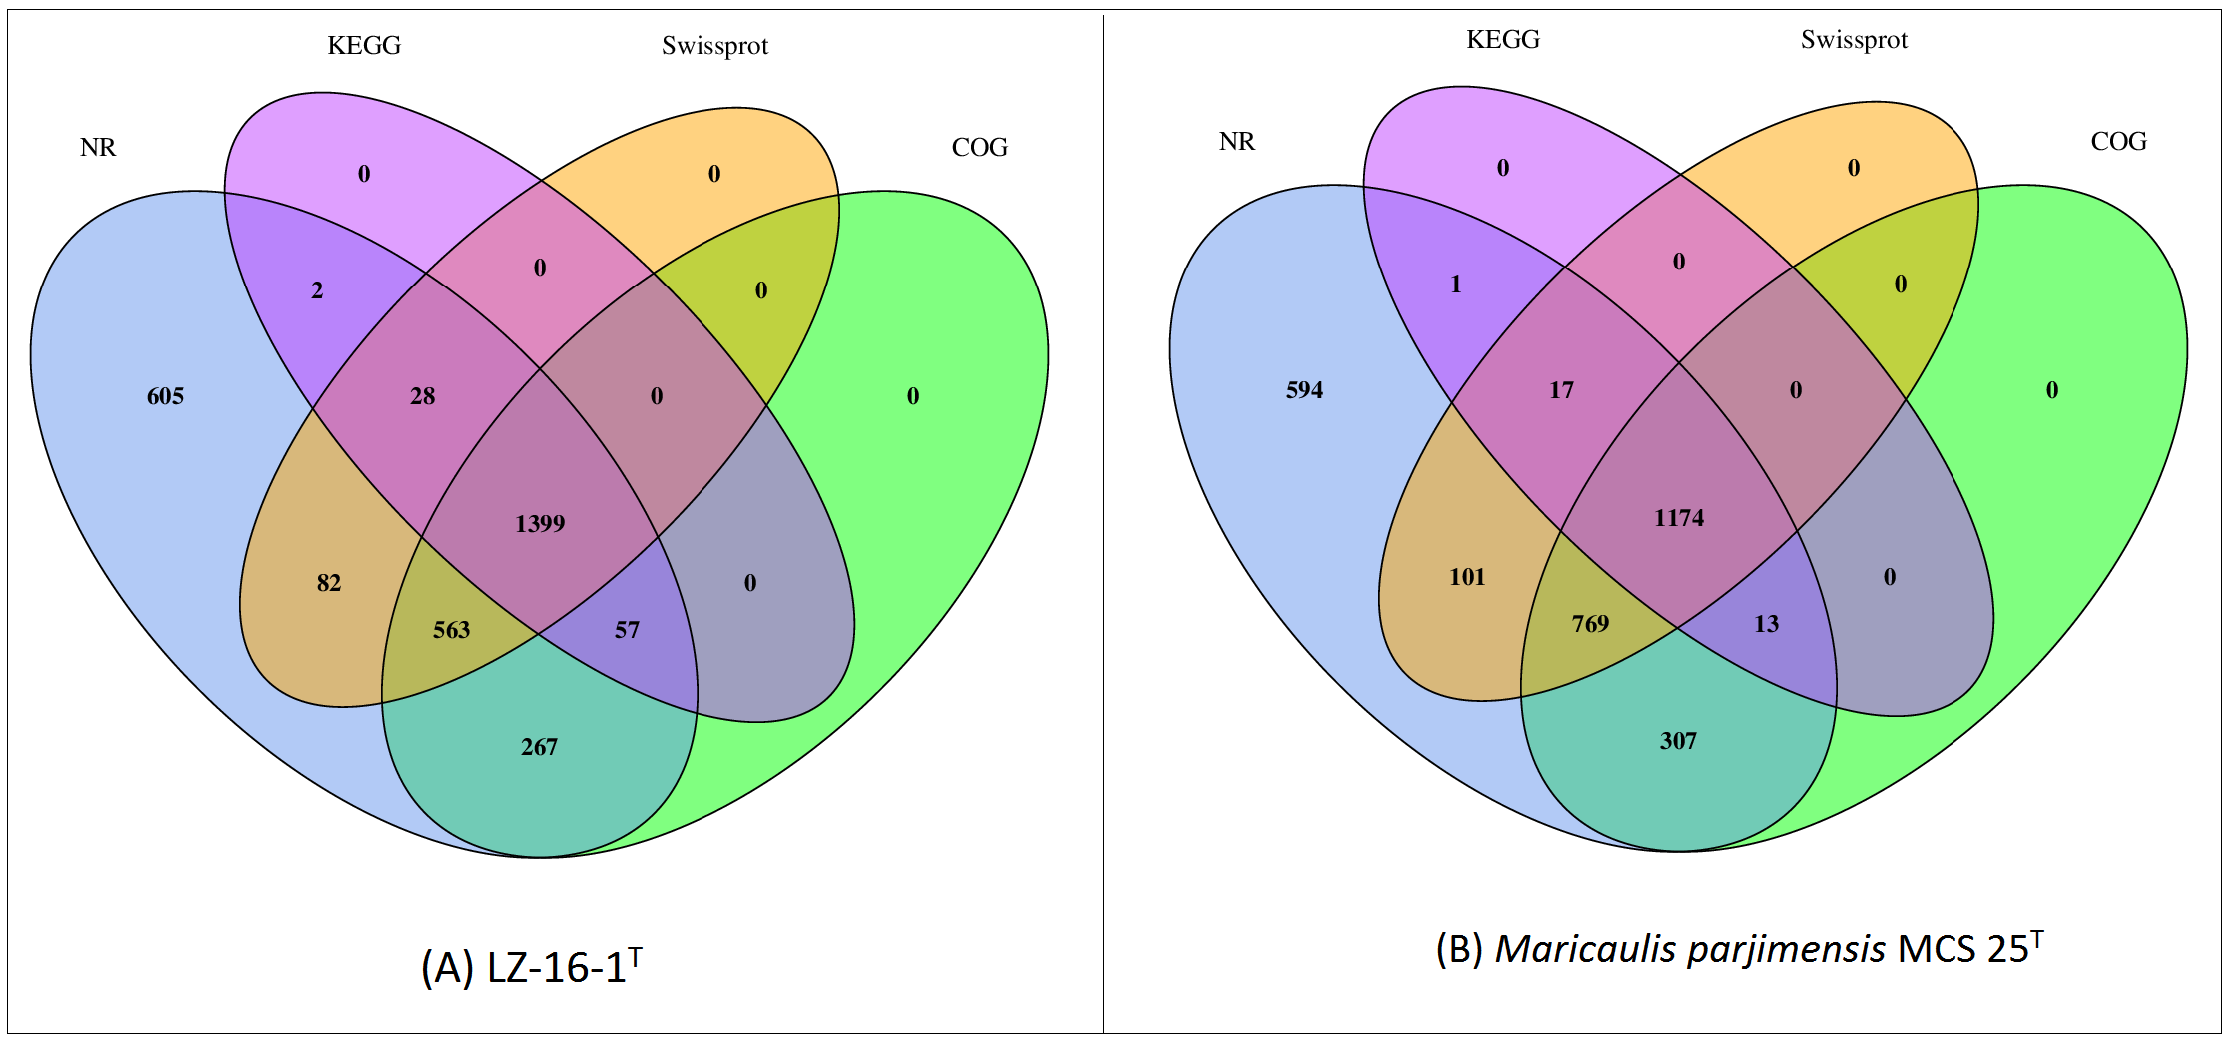


(a)


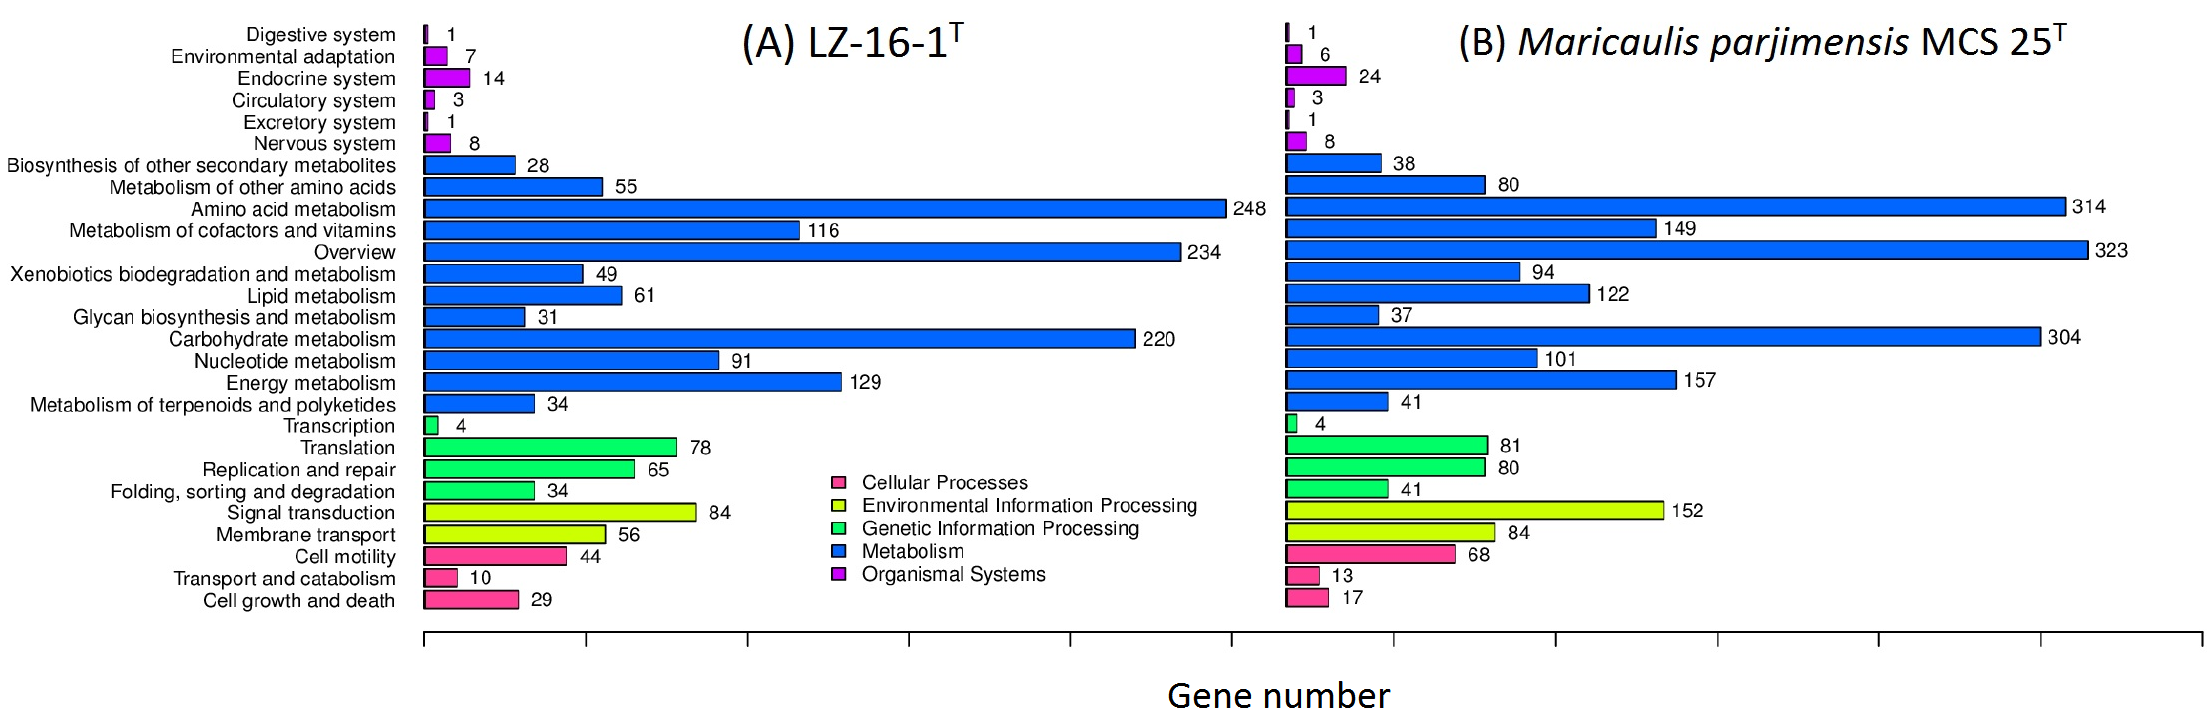
(b)


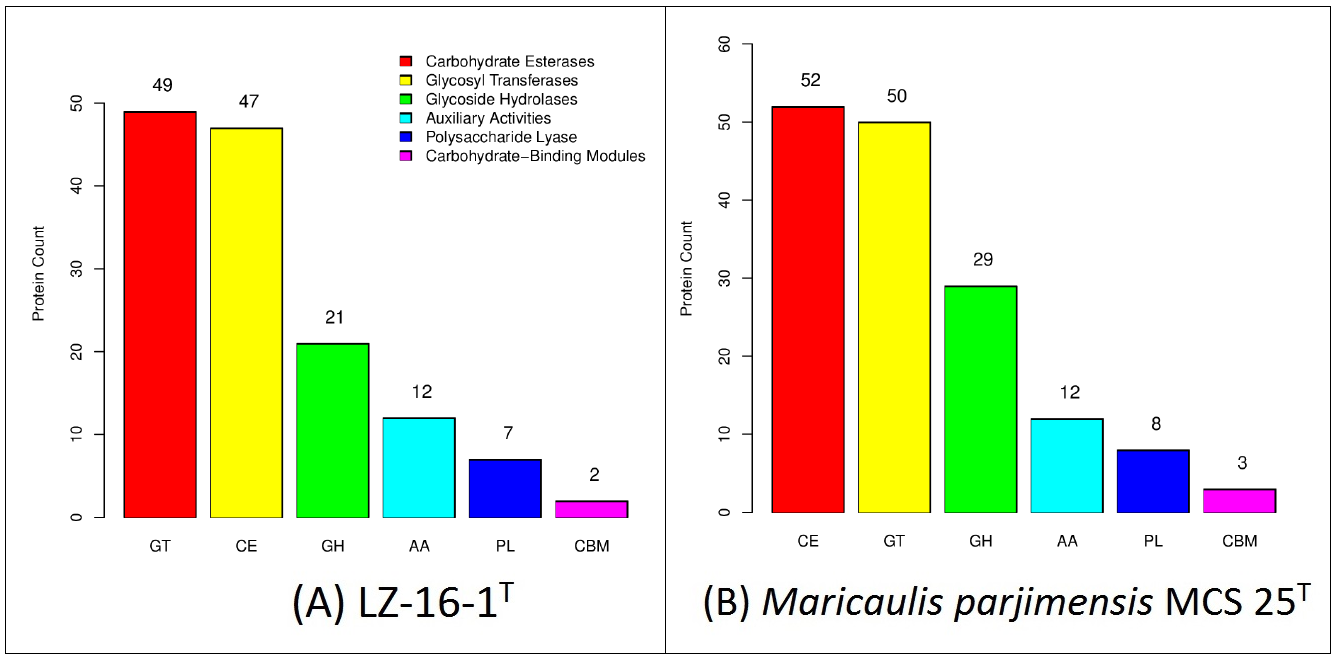


(c)

**Fig. S5** Genome organization of stains LZ-16-1T and *Maricaulis parjimensis* MCS 25T

Each genome is laid out horizontally with homologous segments (LCBs) outlined as colored rectangles. Lines wi the same color collate aligned segments between the two genomes. Average sequence similarities within an LCB, measured in sliding windows, are proportional to the heights of interior colored bars. Large sections of white within blocks and gaps between blocks indicate lineage specific sequence


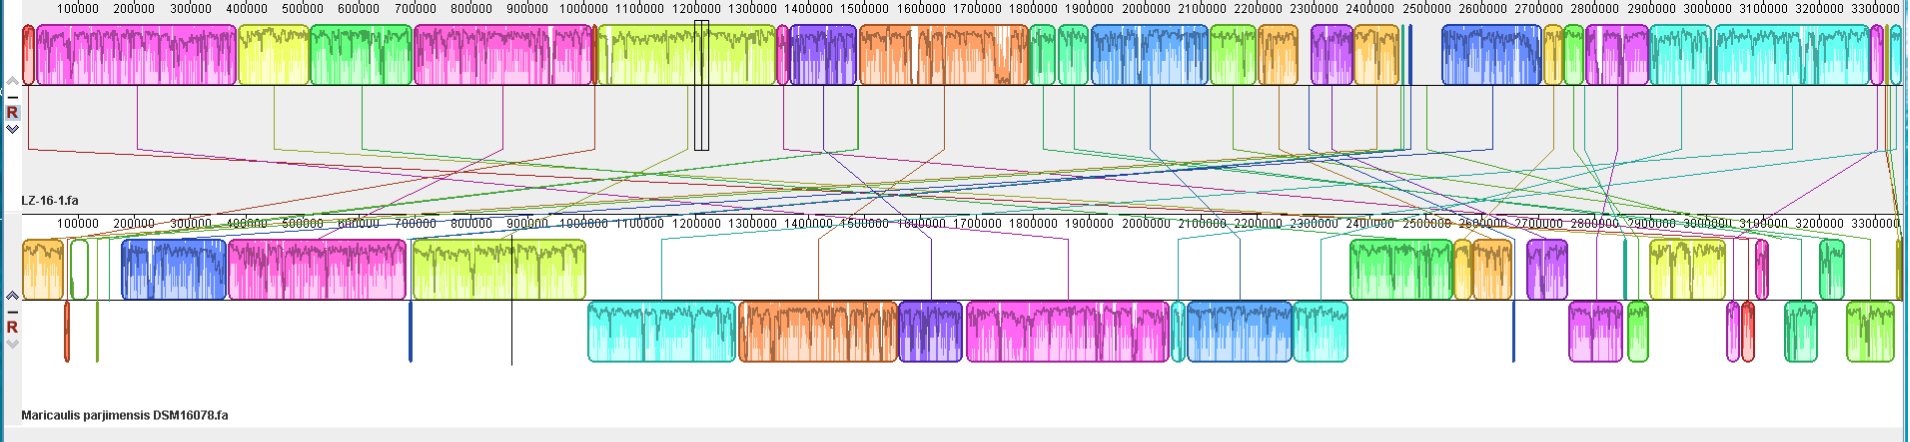


**Table S1** The predicted biosynthesis genes for EPS (a), flagellar motility (b) and pilus assembly (c) of strain LZ-16-1T

| Sequence ID | Gene length  (bp) | Functional units annotation of proteins by Conserved Domain Database (CDD) | Predictor description |
| --- | --- | --- | --- |
| 1. **Polysaccharide biosynthesis** | | | |
| 00034 | 735 | 3e-24 gnl|CDD|224512 COG1596, Wza, Periplasmic protein involved in polysaccharide export, contains SLBB domain of b-grasp fold [Cell wall/membrane/envelope biogenesis]. | Polysaccharide biosynthesis/export protein |
| 00035 | 1545 | 4e-14 gnl|CDD|225747 COG3206, GumC, Uncharacterized protein involved in exopolysaccharide biosynthesis [Cell envelope biogenesis, outer membrane]. | Chain length determinant protein |
| 00039 | 768 | 9e-35 gnl|CDD|200589 cd10967, CE4_GLA_like_6s, Putative catalytic NodB homology domain of gellan lyase and similar proteins. This family is represented by the extracellular polysaccharide-degrading enzyme, gellan lyase (gellanase, EC 4.2.2.-), from Bacillus sp. The enzyme acts on gellan exolytically and releases a tetrasaccharide of glucuronyl-glucosyl-rhamnosyl-glucose with unsaturated glucuronic acid at the nonreducing terminus. The family also includes many uncharacterized prokaryotic polysaccharide deacetylases, which show high sequence similarity to Bacillus sp. gellan lyase. Although their biological functions remain unknown, all members of the family contain a conserved domain with a 6-stranded beta/alpha barrel, which is similar to the catalytic NodB homology domain of rhizobial NodB-like proteins, belonging to the larger carbohydrate esterase 4 (CE4) superfamily. | Polysaccharide deacetylase |
| 00043 | 1533 | 7e-124 gnl|CDD|234092 TIGR03023, WcaJ_sugtrans, Undecaprenyl-phosphate glucose phosphotransferase. This family of proteins encompasses the E. coli WcaJ protein involved in colanic acid biosynthesis, the Methylobacillus EpsB protein involved in methanolan biosynthesis, as well as the GumD protein involved in the biosynthesis of xanthan. All of these are closely related to the well-characterized WbaP (formerly RfbP) protein which is the first enzyme in O-antigen biosynthesis in Salmonella typhimurium. The enzyme transfers galactose from UDP-galactose to a polyprenyl carrier a reaction which takes place at the cytoplasmic face of the inner membrane. The N-terminal hydrophobic domain is then believed to facilitate the "flippase" function of transferring the liposaccharide unit from the cytoplasmic face to the periplasmic face of the inner membrane. Most of these genes are found within large operons dedicated to the production of complex exopolysaccharides such as the enterobacterial O-antigen. Colanic acid biosynthesis utilizes a glucose- undecaprenyl carrier , knockout of EpsB abolishes incorporation of UDP-glucose into the lipid phase and the C-terminal portion of GumD has been shown to be responsible for the glucosyl-1-transferase activity. | UDP-glucose:undecaprenyl-phosphate glucose-1-phosphate transferase |
| 00363 | 1155 | 7e-140 gi|499962615|ref|WP_011643333.1| lipid-A-disaccharide synthase [Maricaulis maris] gi|114340406| gb|ABI65686.1| lipid-A-disaccharide synthase [Maricaulis maris MCS10] | Lipid-A-disaccharide synthase |
| 01974 | 1011 | 4e-99 gnl|CDD|217138 pfam02606, LpxK, Tetraacyldisaccharide-1-P4'-kinase. This family consists of tetraacyldisaccharide-1-P4'-kinase also known as Lipid-A 4'-kinase or Lipid A biosynthesis protein LpxK, EC:2.7.1.130. This enzyme catalyzes the reaction: ATP+ 2,3-bis(3-hydroxytetradecanoyl)-D-glucosaminyl- (beta-D-1,6)-2,3-bis(3-hydroxytetradecanoyl)- D-glucosam inyl beta-phosphate <=> ADP + 2,3,2',3'-tetrakis (3-hydroxytetradecanoyl)-D- glucosaminyl-1,6-beta-D- glucosamine 1,4'-bisphosphate. This enzyme is involved in the synthesis of lipid A portion of the bacterial lipopolysaccharide layer (LPS). | Tetraacyldisaccharide 4'-kinase |
| 02169 | 798 | 1e-24 gnl|CDD|224596 COG1682, TagG, ABC-type polysaccharide/polyol phosphate export systems, permease component. | ABC-2 type transporter |
| 02174 | 771 | 5e-89 gnl|CDD|224057 COG1134, TagH, ABC-type polysaccharide/polyol phosphate transport system, ATPase component [Carbohydrate transport and metabolism/Cell envelope biogenesis, outer membrane]. | Teichoic acids export ATP-binding protein TagH |
| 02443 | 714 | 4e-83 gnl|CDD|133044 cd06422, NTP_transferase_like_1, NTP_transferase_like_1 is a member of the nucleotidyl transferase family. This is a subfamily of nucleotidyl transferases. Nucleotidyl transferases transfer nucleotides onto phosphosugars. The activated sugars are precursors for synthesis of lipopolysaccharide, glycolipids and polysaccharides. Other subfamilies of nucleotidyl transferases include Alpha-D-Glucose-1-Phosphate Cytidylyltransferase, Mannose-1-phosphate guanyltransferase, and Glucose-1-phosphate thymidylyltransferase. | Bifunctional protein GlmU |
| 02522 | 2226 | 1e-75 gnl|CDD|130078 TIGR01005, eps_transp_fam, exopolysaccharide transport protein family. The model describes the exopolysaccharide transport protein family in bacteria. The transport protein is part of a large genetic locus which is associated with exopolysaccharide (EPS) biosynthesis. Detailed molecular characterization and gene fusion analysis revealed atleast seven gene products are involved in the overall regulation, which among other things, include exopolysaccharide biosynthesis, property of conferring virulence and exopolysaccharide export. | Tyrosine-protein kinase ptk |
| 02527 | 570 | 3e-31 gnl|CDD|224512 COG1596, Wza, Periplasmic protein involved in polysaccharide export, contains SLBB domain of b-grasp fold [Cell wall/membrane/envelope biogenesis]. | Polysaccharide biosynthesis/export protein |
| 02536 | 1461 | 2e-25 gnl|CDD|240532 cd13127, MATE_tuaB_like, Uncharacterized subfamily of the multidrug and toxic compound extrusion (MATE) proteins. This family might function as a translocase for lipopolysaccharides and participate in the biosynthesis of cell wall components such as teichuronic acid. The integral membrane proteins from the MATE family are involved in exporting metabolites across the cell membrane and are responsible for multidrug resistance (MDR) in many bacteria and animals. A number of family members are involved in the synthesis of peptidoglycan components in bacteria. | Lipopolysaccharide biosynthesis protein WzxC |
| 02671 | 1074 | 0.0 gnl|CDD|132628 TIGR03589, PseB, UDP-N-acetylglucosamine 4,6-dehydratase. This enzyme catalyzes the first step in the biosynthesis of pseudaminic acid, the conversion of UDP-N-acetylglucosamine to UDP-4-keto-6-deoxy-N-acetylglucosamine. These sequences are members of the broader pfam01073 (3-beta hydroxysteroid dehydrogenase/isomerase family) family. | UDP-N-acetylglucosamine 4,6-dehydratase (inverting) |
| 02680 | 972 | 2e-18 gnl|CDD|226488 COG3980, spsG, Spore coat polysaccharide biosynthesis protein, predicted glycosyltransferase [Cell envelope biogenesis, outer membrane]. | UDP-N-acetylglucosamine-N-acetylmuramyl-(pentapeptide)pyrophosphoryl-undecaprenol |
| 03029 | 618 | 1e-28 gnl|CDD|218877 pfam06055, ExoD, Exopolysaccharide synthesis, ExoD. Among the bacterial genes required for nodule invasion are the exo genes. These genes are involved in the production of an extracellular polysaccharide. Mutations in the exoD result in altered exopolysaccharide production and defects in nodule invasion. | Exopolysaccharide synthesis, ExoD |
| 1. **Flagellar motility** | | | |
| 01550 | 1092 | 1e-148 gnl|CDD|235569 PRK05702, flhB, flagellar biosynthesis protein FlhB | Flagellar biosynthetic protein FlhB |
| 01551 | 753 | 3e-36 gnl|CDD|235568 PRK05701, fliR, flagellar biosynthesis protein FliR | flagellar biosynthesis protein FliR |
| 01552 | 264 | 3e-25 gnl|CDD|235671 PRK06010, fliQ, flagellar biosynthesis protein FliQ | Flagellar biosynthetic protein FliQ |
| 01556 | 309 | 2e-16 gnl|CDD|179101 PRK00732, fliE, flagellar hook-basal body protein FliE | Flagellar hook-basal body complex protein FliE |
| 01557 | 414 | 3e-59 gnl|CDD|235556 PRK05681, flgC, flagellar basal body rod protein FlgC | Flagellar basal-body rod protein FlgC |
| 01558 | 441 | 4e-28 gnl|CDD|235667 PRK06004, flgB, flagellar basal body rod protein FlgB | Flagellar basal body rod protein FlgB |
| 01560 | 765 | 2e-93 gnl|CDD|235566 PRK05699, fliP, flagellar biosynthesis protein FliP | Flagellar biosynthetic protein FliP precursor |
| 01565 | 1134 | 0.0 gnl|CDD|237208 PRK12795, fliM, flagellar motor switch protein FliM | Flagellar motor switch protein FliM |
| 01567 | 753 | 1e-56 gnl|CDD|227125 COG4786, FlgG, Flagellar basal body rod protein [Cell motility and secretion]. | Flagellar basal-body rod protein FlgG |
| 01568 | 786 | 1e-153 gnl|CDD|183686 PRK12691, flgG, flagellar basal body rod protein FlgG | Flagellar basal-body rod protein FlgG |
| 01569 | 945 | 9e-82 gnl|CDD|237201 PRK12786, flgA, flagellar basal body P-ring biosynthesis protein FlgA | flagellar basal body P-ring biosynthesis protein FlgA |
| 01570 | 747 | 2e-87 gnl|CDD|234700 PRK00249, flgH, flagellar basal body L-ring protein | Flagellar L-ring protein precursor |
| 01925 | 2142 | 3e-30 gnl|CDD|233894 TIGR02492, flgK_ends, flagellar hook-associated protein FlgK. | Flagellar hook-associated protein 1 |
| 01926 | 1884 | 3e-13 gnl|CDD|216885 pfam02120, Flg_hook, Flagellar hook-length control protein FliK. | Flagellar hook-length control protein FliK |
| 01927 | 690 | 8e-20 gnl|CDD|224756 COG1843, FlgD, Flagellar hook capping protein [Cell motility and secretion]. | Basal-body rod modification protein FlgD |
| 01928 | 1389 | 2e-83 gnl|CDD|235557 PRK05682, flgE, flagellar hook protein FlgE | Flagellar hook protein FlgE |
| 01930 | 1638 | 5e-141 gnl|CDD|235668 PRK06007, fliF, flagellar MS-ring protein | Flagellar M-ring protein |
| 01931 | 1023 | 3e-144 gnl|CDD|235561 PRK05686, fliG, flagellar motor switch protein G | Flagellar motor switch protein FliG |
| 01932 | 648 | 5e-36 gnl|CDD|235679 PRK06032, fliH, flagellar assembly protein H | flagellar assembly protein H |
| 01933 | 366 | 1e-43 gnl|CDD|236350 PRK08916, PRK08916, flagellar motor switch protein | Flagellar motor switch protein FliN |
| 01935 | 2133 | 0.0 gnl|CDD|235672 PRK06012, flhA, flagellar biosynthesis protein FlhA | Flagellar biosynthesis protein FlhA |
| 01937 | 801 | 7e-42 gnl|CDD|223531 COG0455, flhG, Antiactivator of flagellar biosynthesis FleN, an ATPase [Cell motility]. | Flagellum site-determining protein YlxH |
| 01942 | 1347 | 0.0 gnl|CDD|236351 PRK08927, fliI, flagellum-specific ATP synthase | Flagellum-specific ATP synthase |
| 02208 | 873 | 2e-140 gnl|CDD|181655 PRK09110, PRK09110, flagellar motor protein MotA. | Motility protein A |
| 02665 | 420 | 1e-28 gnl|CDD|183745 PRK12787, fliX, flagellar assembly regulator FliX | Flagellar assembly protein FliX |
| 02666 | 1122 | 3e-177 gnl|CDD|235399 PRK05303, flgI, flagellar basal body P-ring protein. | Flagellar P-ring protein precursor |
| 02677 | 384 | 4e-45 gnl|CDD|237207 PRK12794, flaF, flagellar biosynthesis regulatory protein FlaF | flagellar biosynthesis regulatory protein FlaF |
| 02678 | 387 | 3e-58 gnl|CDD|179127 PRK00794, flbT, flagellar biosynthesis repressor FlbT | flagellum biosynthesis repressor protein FlbT |
| 02803 | 1389 | 1e-19 gnl|CDD|216608 pfam01618, MotA_ExbB, MotA/TolQ/ExbB proton channel family. | Biopolymer transport protein ExbB |
| 1. **Pilus assembly** | | | |
| 242 | 492 | 7e-08 gnl|CDD|130769 TIGR01708, type II_sec_gspH, type II secretion system protein H. | hypothetical protein |
| 1114 | 1554 | 8e-10 gnl|CDD|227296 COG4961, TadG, Flp pilus assembly protein TadG [Intracellular trafficking and secretion]. | von Willebrand factor type A domain protein |
| 1115 | 1485 | 6e-09 gnl|CDD|227296 COG4961, TadG, Flp pilus assembly protein TadG [Intracellular trafficking and secretion]. | hypothetical protein |
| 1437 | 711 | 1e-06 gnl|CDD|225663 COG3121, FimC, P pilus assembly protein, chaperone PapD [Cell motility and secretion / Intracellular trafficking and secretion]. | hypothetical protein |
| 1458 | 624 | 1e-07 gnl|CDD|219344 pfam07238, PilZ, PilZ domain. PilZ is a c-di-GMP binding domain which is found C terminal to pfam07317. Proteins which contain PilZ are known to interact with the flagellar switch-complex proteins FliG and FliM. | PilZ domain protein |
| 3078 | 993 | 8e-78 gnl|CDD|227300 COG4965, TadB, Flp pilus assembly protein TadB [Intracellular trafficking and secretion]. | Bacterial type II secretion system protein F domain protein |
| 3080 | 1521 | 5e-74 gnl|CDD|227298 COG4963, CpaE, Flp pilus assembly protein, ATPase CpaE [Intracellular trafficking and secretion]. | Septum site-determining protein MinD |
| 3081 | 675 | 8e-44 gnl|CDD|220255 pfam09476, Pilus_CpaD, Pilus biogenesis CpaD protein (pilus_cpaD). Proteins in this entry consist of a pilus biogenesis protein, CpaD, from Caulobacter, and homologues in other bacteria, including three in the root nodule bacterium Bradyrhizobium japonicum. | Pilus biogenesis CpaD protein (pilus_cpaD) |
| 3083 | 846 | 3e-51 gnl|CDD|234138 TIGR03177, pilus_cpaB, Flp pilus assembly protein CpaB. Members of this protein family are the CpaB protein of Flp-type pilus assembly. Similar proteins include the FlgA protein of bacterial flagellum biosynthesis. | hypothetical protein |
| 3085 | 159 | - | Flp/Fap pilin component |
| 3087 | 552 | 3e-11 gnl|CDD|227296 COG4961, TadG, Flp pilus assembly protein TadG [Intracellular trafficking and secretion]. | TadE-like protein |
